# Supplementary material for: Phagocytosis-like cell engulfment by a planctomycete bacterium
Source: PubMed Central journal article supplement (PMC6906331; doi:10.1038/s41467-019-13499-2), 2019-12-11
Supplement: 41467_2019_13499_MOESM1_ESM.pdf [file 41467_2019_13499_MOESM1_ESM.pdf]

Supplementary Information

Phagocytosis-like cell engulfment by a planctomycete bacterium

Shiratori et al.

**Supplementary Table 1 | 16S rRNA gene sequences obtained from xenic culture of *Candidatus Uab amorphum*\***

| query                                                    | sequence length | blastn top hit*                                               | identity |
|----------------------------------------------------------|-----------------|---------------------------------------------------------------|----------|
| Contig 1 (Accession No.)<br>(= <i>Ca. Uab amorphum</i> ) | 1479 bp         | <i>Candidatus</i> <i>Kueneria stuttgartiensis</i> CT573071.1q | 79%      |
| Contig 2 (= prey bacterium)                              | 1455 bp         | <i>Alteromonas</i> sp. strain SS12.31 KC160922.1              | 95%      |
| Contig 3 (= prey bacterium)                              | 1455 bp         | <i>Alteromonas</i> sp. strain SS12.31 KC160922.1              | 99%      |
| Contig 4 (= prey bacterium)                              | 1455 bp         | <i>Alteromonas</i> sp. strain CF6-3 FJ169998.1                | 99%      |
| Contig 5 (= prey bacterium)                              | 1463 bp         | <i>Alcanivorax</i> sp. strain NT N57 AB166992.1               | 99%      |
| Contig 6 (= prey bacterium)                              | 1461 bp         | <i>Pseudomonas pachastrellae</i> strain PTG4-14 EU603457.1    | 99%      |

\* Uncultured/environmental sequences are excluded.

Supplementary Table 2 | Contigs derived from monoxetic culture of 'Candidatus Uab amorphum'

| contig name | length (bp) | number of reads | circular | sequence similarity with <i>Alteromonas macleodii</i> genome (%) | sequence similarity with <i>Ca. Uab amorphum</i> q16S rRNA gene (%) | remarks                                |
|-------------|-------------|-----------------|----------|------------------------------------------------------------------|---------------------------------------------------------------------|----------------------------------------|
| tig00000001 | 9512535     | 37028           | Yes*     | 75.49                                                            | 100                                                                 | Genome of <i>Ca. Uab amorphum</i> q    |
| tig00000060 | 261064      | 167             | No       | 99.86                                                            | -                                                                   | Genome of <i>Alteromonas macleodii</i> |
| tig00000062 | 234149      | 155             | No       | 99.85                                                            | -                                                                   | Genome of <i>A. macleodii</i>          |
| tig00000065 | 273226      | 177             | No       | 99.87                                                            | -                                                                   | Genome of <i>A. macleodii</i>          |
| tig00000067 | 226284      | 124             | No       | 99.83                                                            | -                                                                   | Genome of <i>A. macleodii</i>          |
| tig00000069 | 21259       | 33              | No       | -                                                                | -                                                                   | Possible contaminated sequence         |
| tig00000070 | 160080      | 96              | No       | 99.82                                                            | -                                                                   | Genome of <i>A. macleodii</i>          |
| tig00000072 | 134043      | 80              | No       | 99.85                                                            | 76.7                                                                | Genome of <i>A. macleodii</i>          |
| tig00000073 | 125702      | 81              | No       | 99.91                                                            | 76.8                                                                | Genome of <i>A. macleodii</i>          |
| tig00000076 | 122497      | 75              | No       | 99.89                                                            | -                                                                   | Genome of <i>A. macleodii</i>          |
| tig00000078 | 106860      | 65              | No       | 99.88                                                            | -                                                                   | Genome of <i>A. macleodii</i>          |
| tig00000080 | 118729      | 71              | No       | 99.9                                                             | 76.8                                                                | Genome of <i>A. macleodii</i>          |
| tig00000082 | 131388      | 84              | No       | 99.82                                                            | -                                                                   | Genome of <i>A. macleodii</i>          |
| tig00000084 | 93001       | 51              | No       | 99.76                                                            | -                                                                   | Genome of <i>A. macleodii</i>          |
| tig00000087 | 49583       | 110             | No       | -                                                                | -                                                                   | Possible contaminated sequence         |
| tig00000088 | 94658       | 57              | No       | 99.8                                                             | -                                                                   | Genome of <i>A. macleodii</i>          |
| tig00000091 | 104558      | 61              | No       | 99.8                                                             | -                                                                   | Genome of <i>A. macleodii</i>          |
| tig00000093 | 98049       | 51              | No       | 99.88                                                            | -                                                                   | Genome of <i>A. macleodii</i>          |
| tig00000095 | 75936       | 42              | No       | 99.84                                                            | -                                                                   | Genome of <i>A. macleodii</i>          |
| tig00000098 | 89759       | 58              | No       | 99.79                                                            | -                                                                   | Genome of <i>A. macleodii</i>          |
| tig00000101 | 82362       | 38              | No       | 99.67                                                            | -                                                                   | Genome of <i>A. macleodii</i>          |
| tig00000103 | 71695       | 37              | No       | 99.83                                                            | -                                                                   | Genome of <i>A. macleodii</i>          |
| tig00000104 | 77492       | 41              | No       | 99.92                                                            | -                                                                   | Genome of <i>A. macleodii</i>          |
| tig00000107 | 77070       | 39              | No       | 99.69                                                            | -                                                                   | Genome of <i>A. macleodii</i>          |
| tig00000109 | 64220       | 32              | No       | 99.73                                                            | -                                                                   | Genome of <i>A. macleodii</i>          |
| tig00000111 | 68023       | 27              | No       | 99.72                                                            | -                                                                   | Genome of <i>A. macleodii</i>          |
| tig00000112 | 52636       | 31              | No       | 99.87                                                            | -                                                                   | Genome of <i>A. macleodii</i>          |
| tig00000113 | 61047       | 28              | No       | 99.71                                                            | -                                                                   | Genome of <i>A. macleodii</i>          |
| tig00000118 | 57389       | 24              | No       | 99.69                                                            | -                                                                   | Genome of <i>A. macleodii</i>          |
| tig00000120 | 40726       | 26              | No       | 99.82                                                            | -                                                                   | Genome of <i>A. macleodii</i>          |
| tig00000121 | 50932       | 21              | No       | 99.76                                                            | -                                                                   | Genome of <i>A. macleodii</i>          |
| tig00000123 | 62357       | 33              | No       | 99.69                                                            | -                                                                   | Genome of <i>A. macleodii</i>          |
| tig00000126 | 38526       | 21              | No       | 99.76                                                            | -                                                                   | Genome of <i>A. macleodii</i>          |
| tig00000127 | 47338       | 17              | No       | 99.78                                                            | 76.9                                                                | Genome of <i>A. macleodii</i>          |
| tig00000128 | 43453       | 25              | No       | 99.77                                                            | -                                                                   | Genome of <i>A. macleodii</i>          |
| tig00000132 | 63223       | 29              | No       | 99.67                                                            | -                                                                   | Genome of <i>A. macleodii</i>          |
| tig00000134 | 52946       | 21              | No       | 99.71                                                            | -                                                                   | Genome of <i>A. macleodii</i>          |
| tig00000135 | 56857       | 24              | No       | 99.59                                                            | -                                                                   | Genome of <i>A. macleodii</i>          |
| tig00000136 | 31868       | 16              | No       | 99.71                                                            | -                                                                   | Genome of <i>A. macleodii</i>          |
| tig00000140 | 48298       | 27              | No       | 99.8                                                             | -                                                                   | Genome of <i>A. macleodii</i>          |
| tig00000143 | 42676       | 23              | No       | 99.4                                                             | 76.8                                                                | Genome of <i>A. macleodii</i>          |
| tig00000145 | 40438       | 18              | No       | 99.74                                                            | -                                                                   | Genome of <i>A. macleodii</i>          |
| tig00000147 | 30108       | 13              | No       | 99.52                                                            | -                                                                   | Genome of <i>A. macleodii</i>          |
| tig00000148 | 32818       | 24              | No       | 99.58                                                            | -                                                                   | Genome of <i>A. macleodii</i>          |
| tig00000151 | 27296       | 7               | No       | 99.64                                                            | -                                                                   | Genome of <i>A. macleodii</i>          |
| tig00000152 | 26359       | 12              | No       | 99.78                                                            | -                                                                   | Genome of <i>A. macleodii</i>          |
| tig00000153 | 36697       | 15              | No       | 99.77                                                            | -                                                                   | Genome of <i>A. macleodii</i>          |
| tig00000175 | 24132       | 10              | No       | 99.66                                                            | -                                                                   | Genome of <i>A. macleodii</i>          |
| tig00000178 | 22849       | 3               | No       | 98.99                                                            | -                                                                   | Genome of <i>A. macleodii</i>          |

\*Circulized length; 9,503,110 bp

**Supplementary Table 3 | Genome characteristics of ‘*Candidatus Uab amorphum*’ and eight planctomycete bacteria**

| strain                      | <i>Ca. Uab amorphum</i> | <i>I. pallida</i>          | <i>S. acidiphila</i>                                     | <i>P. limnophila</i>       | <i>P. staleyii</i> | <i>R. baltica</i> | <i>Gemmata</i> sp. | <i>R. brasiliensis</i> | <i>P. mikurensis</i>       |
|-----------------------------|-------------------------|----------------------------|----------------------------------------------------------|----------------------------|--------------------|-------------------|--------------------|------------------------|----------------------------|
| strain                      | SRT547                  | ATCC43644                  | DSM 18658                                                | DSM 3776                   | DSM 6068           | SH1               | SH-PL17            | DSM 5305               | NBRC 102666                |
| Genome size (Mbp)           | 9.5                     | 5.5                        | 9.8                                                      | 5.4                        | 6.2                | 7.2               | 9.1                | 6                      | 3.9                        |
| Number of plasmids          | 0                       | 1                          | 3                                                        | 1                          | 0                  | 0                 | 0                  | 0                      | 1                          |
| GC%                         | 39.4                    | 62.4                       | 62.3                                                     | 53.7                       | 57.5               | 55.4              | 64.2               | 56.4                   | 73.2                       |
| Number of CDSs              | 6,660                   | 3888                       | 7369                                                     | 4301                       | 4596               | 7325              | 7312               | 4719                   | 3060                       |
| Number of rRNAs             | 6                       | 9                          | 24                                                       | 4                          | 3                  | 3                 | 9                  | 6                      | 3                          |
| Number of tRNAs             | 75                      | 47                         | 64                                                       | 59                         | 44                 | 76                | 70                 | 45                     | 46                         |
| Average Protein Length (aa) | 422.5                   | 400.7                      | 362.8                                                    | 358.9                      | 382.4              | 315.7             | 344.7              | 362.2                  | 371.7                      |
| Coding Ratio (CDSs)         | 91.5                    | 85.0                       | 81.8                                                     | 85.8                       | 85.0               | 96.3              | 83.1               | 85.5                   | 87.5                       |
| Reference sequences         |                         | NC_014962.1<br>NC_014957.1 | NC_019892.1<br>NC_019893.1<br>NC_019894.1<br>NC_019895.1 | NC_014148.1<br>NC_014149.1 | NC_013720.1        | NC_005027.1       | NZ_CP011271.1      | NC_015174.1            | NC_017080.1<br>NC_017081.1 |

**Supplementary Table 4 | Genes related to protein transport**

| gene symbol                          | protein ID  |             |             |             |             |             |             |
|--------------------------------------|-------------|-------------|-------------|-------------|-------------|-------------|-------------|
| <b>Type II secretion system</b>      |             |             |             |             |             |             |             |
| GspD                                 | UABAM_02558 | UABAM_04083 | UABAM_06223 | UABAM_06224 | UABAM_06602 |             |             |
| GspF                                 | UABAM_00096 |             |             |             |             |             |             |
| GspG                                 | UABAM_00092 | UABAM_00095 | UABAM_01505 | UABAM_03303 | UABAM_04783 |             |             |
| GspJ                                 | UABAM_06062 |             |             |             |             |             |             |
| GspK                                 | UABAM_01912 |             |             |             |             |             |             |
| GspE                                 | UABAM_01005 | UABAM_01007 | MPLA_01236  | UABAM_01321 | UABAM_01463 | UABAM_06138 | UABAM_06222 |
| GspO                                 | UABAM_01995 |             |             |             |             |             |             |
| <b>Sec-SRP</b>                       |             |             |             |             |             |             |             |
| SecD/F                               | UABAM_02674 | UABAM_04093 |             |             |             |             |             |
| SecY                                 | UABAM_03972 |             |             |             |             |             |             |
| YidC                                 | UABAM_00120 |             |             |             |             |             |             |
| SecA                                 | UABAM_01766 | UABAM_03633 | UABAM_03639 |             |             |             |             |
| FtsY                                 | UABAM_01922 |             |             |             |             |             |             |
| ffh                                  | UABAM_06162 |             |             |             |             |             |             |
| <b>Twin arginine targeting (Tat)</b> |             |             |             |             |             |             |             |
| TatC                                 | UABAM_01580 |             |             |             |             |             |             |

Supplementary Table 5 | Genes related to Peptidoglycan biosynthesis

|                          |                                                                | protein ID                                                             |           |
|--------------------------|----------------------------------------------------------------|------------------------------------------------------------------------|-----------|
| Gene symbol              | blastp hit of <i>S. aureus</i> Uab amorphum proteins (e-value) | blastp query<br>( <i>Escherichia coli</i> K-12 MG1655)                 |           |
|                          | MurA                                                           | UABAM_03634 (6.12e-86), UABAM_03143 (3.72e-4)                          | NP_417656 |
|                          | MurB                                                           | UABAM_01805 (6.16e-14)                                                 | NP_418403 |
|                          | MurC                                                           | UABAM_01806 (6.03e-79)                                                 | NP_414633 |
|                          | MurD                                                           | UABAM_00997 (3.95e-38), UABAM_01806 (9.01e-10)                         | NP_414630 |
|                          | MurE                                                           | UABAM_01806 (1.69e-11), UABAM_00997 (1.19e-7)                          | NP_414627 |
|                          | MurF                                                           | UABAM_01806 (5.59e-10), UABAM_00997 (2.81e-8)                          | NP_414628 |
|                          | MraY                                                           | UABAM_01808 (2.39e-57), UABAM_06107 (9.87e-3)                          | NP_414629 |
|                          | MurG                                                           | UABAM_01807 (1.34e-32)                                                 | NP_414632 |
|                          | MurJ/MviN                                                      | UABAM_01276 (5.26e-42), UABAM_00844 (2.2e-4)                           | NP_415587 |
|                          | MtgA                                                           |                                                                        | NP_417675 |
| low-molecular-weight PBP | dacA                                                           |                                                                        | NP_415165 |
|                          | dacB                                                           | UABAM_04933 (1.42e-48)                                                 | NP_417649 |
|                          | dacC                                                           |                                                                        | NP_415360 |
|                          | dacD                                                           | UABAM_04185 (9.92e-2)                                                  | NP_416514 |
|                          | yfew                                                           | UABAM_03436 (3.27e-18), UABAM_05443 (1.54e-16), UABAM_00445 (5.77e-15) | NP_416925 |
| classA PBP               | mrcA                                                           |                                                                        | NP_417855 |
|                          | mrcB                                                           |                                                                        | NP_414691 |
|                          | pbpC                                                           |                                                                        | NP_417014 |
| classB PBP               | mrdA                                                           |                                                                        | NP_415168 |
|                          | ftsI                                                           |                                                                        | NP_414626 |

**Supplementary Table 6 | Number of HGT-derived genes and their possible donors\***

|                            | number of genes |
|----------------------------|-----------------|
| HGT-derived genes          |                 |
| Archaea                    | 43              |
| Crenarchaeota              | 1               |
| Euryarchaeota              | 40              |
| Thaumarchaeota             | 2               |
| Eukarya                    | 2               |
| Ascomycota                 | 2               |
| Bacteria                   | 1778            |
| Acidobacteria              | 31              |
| Actinobacteria             | 40              |
| Aquificae                  | 8               |
| Armatimonadetes            | 2               |
| Bacteroidetes              | 239             |
| Balneolaeota               | 14              |
| Calditrichaeota            | 17              |
| Candidatus Kryptonia       | 19              |
| Chlorobi                   | 8               |
| Chloroflexi                | 46              |
| Chrysiogenetes             | 1               |
| Cyanobacteria              | 172             |
| Deferribacteres            | 10              |
| Deinococcus-Thermus        | 11              |
| Elusimicrobia              | 3               |
| Fibrobacteres              | 6               |
| Firmicutes                 | 326             |
| Fusobacteria               | 3               |
| Gemmatimonadetes           | 2               |
| Ignavibacteriae            | 25              |
| Nitrospinae                | 9               |
| Nitrospirae                | 16              |
| Proteobacteria             | 689             |
| Spirochaetes               | 39              |
| Synergistetes              | 8               |
| Thermodesulfobacteria      | 9               |
| Thermotogae                | 10              |
| Total                      | 1823            |
| non HGT-derived genes      | 4777            |
| Total protein coding genes | 6600            |

\* search cutoffs: E-value < 1E-20, identity > 30%, and coverage > 40%

Supplementary Table 7 | Eukaryote signature proteins in *Candidatus* Uab amorphumgenome.

|                              | Gene symbol | <i>S. cerevisiae</i> protein ID | blastp querying <i>S. cerevisiae</i> proteins against <i>Ca</i> . Uab amorphumproteins |             | blastp querying <i>Ca</i> . Uab amorphumproteins against NCBI nr database                      |           |
|------------------------------|-------------|---------------------------------|----------------------------------------------------------------------------------------|-------------|------------------------------------------------------------------------------------------------|-----------|
|                              |             |                                 | blast top hit ( <i>Ca</i> . Uab amorphumproteins)                                      | e-value     | blast top hit (nr) (removing hypothetical proteins and data from metagenome)                   | e-value   |
| Actin                        | Act1        | YFL039C                         | UABAM_01738                                                                            | 1.15E-75    | actin [Cordyceps confragosa RCEF 1005]                                                         | 7.00E-75  |
| Actin-related                | Arp1        | YHR129C                         | UABAM_01738                                                                            | 2.54E-39    | actin [Cordyceps confragosa RCEF 1005]                                                         | 7.00E-75  |
|                              | Arp2        | YDL029W                         | UABAM_01738                                                                            | 4.99E-45    | actin [Cordyceps confragosa RCEF 1005]                                                         | 7.00E-75  |
|                              | Arp3        | YJR065C                         | UABAM_01738                                                                            | 9.09E-29    | actin [Cordyceps confragosa RCEF 1005]                                                         | 7.00E-75  |
|                              | Arp4        | YJL081C                         | UABAM_01738                                                                            | 6.06E-08    | actin [Cordyceps confragosa RCEF 1005]                                                         | 7.00E-75  |
|                              | Arp5        | YNL059C                         | UABAM_01738                                                                            | 0.00000502  | actin [Cordyceps confragosa RCEF 1005]                                                         | 7.00E-75  |
|                              | Arp6        | YLR085C                         | UABAM_01738                                                                            | 0.00000021  | actin [Cordyceps confragosa RCEF 1005]                                                         | 7.00E-75  |
| Translation factors          | Cam1        | YPL048W                         | UABAM_05207                                                                            | 0.00000073  | glutathione S-transferase family protein [Lentisphaera araneosa]                               | 2.00E-52  |
| GTP-binding proteins         | Rho2        | YNL090W                         | UABAM_04157                                                                            | 0.00000774  | GTPase [Fibrobacter succinogenes]                                                              | 2.00E-78  |
|                              | Ypl6        | YLR262C                         | UABAM_02845                                                                            | 0.000000246 | GTP-binding protein [Mastigocoleus testarum]                                                   | 0         |
|                              | Ar3         | YPL051W                         | UABAM_06593                                                                            | 0.000000489 | WD40 repeat [Candidatus Kryptonium thompsoni]                                                  | 4.00E-47  |
| Cyclin                       | Cak1        | YFL029C                         | UABAM_06662                                                                            | 3.22E-12    | Stk1 family PASTA domain-containing Ser/Thr kinase [Firmicutes bacterium AF12-30]              | 6.00E-41  |
| Kinases and phosphatases     | Cdc7        | YDL017W                         | UABAM_00443                                                                            | 4.35E-12    | tetratricopeptide repeat protein [Sphaerospermopsis reniformis]                                | 5.00E-116 |
|                              | Sky1        | YMR216C                         | UABAM_05439                                                                            | 2.21E-09    | serine/threonine protein kinase [Patulibacter americanus]                                      | 2.00E-37  |
|                              | Iks1        | YJL057C                         | UABAM_01928                                                                            | 4.21E-15    | tetratricopeptide repeat protein [Candidatus Aminicenantes bacterium]                          | 2.00E-49  |
|                              | Ykl171w     | YKL171W                         | UABAM_03534                                                                            | 2.01E-09    | serine/threonine protein kinase [Rhodopirellula sp.]                                           | 6.00E-62  |
|                              | Vps15       | YBR097W                         | UABAM_03878                                                                            | 0.00000015  | serine/threonine protein kinase [Rubinisphaera sp.]                                            | 2.00E-52  |
|                              | Kns1        | YLL019C                         | UABAM_00315                                                                            | 5.22E-15    | serine/threonine protein kinase [Nonomurea sp. KC333]                                          | 6.00E-41  |
|                              | Cdc14       | YFR028C                         | UABAM_01136                                                                            | 1.33E-12    | protein tyrosine phosphatase [Candiadus Scalindua japonica]                                    | 2.00E-40  |
|                              | Cdc55       | YGL190C                         | UABAM_04730                                                                            | 0.000000328 | NACHT nucleoside triphosphatase [Penicillium camemberti]                                       | 0         |
|                              | Sds22       | YKL193C                         | UABAM_03630                                                                            | 1.36E-13    | leucine rich repeat protein [Leptospira noguchii]                                              | 3.00E-67  |
| Histone-associated           | Hat2        | YEL056W                         | UABAM_04296                                                                            | 1.14E-15    | (Myosin heavy-chain) kinase., Histone acetyltransferase [Haliscomenobacter hydrossis DSM 1100] | 0         |
| Nuclear pore and transport   | Glc2        | YDR477W                         | UABAM_04480                                                                            | 1.74E-32    | Serine/threonine protein kinase [Planctomicrobium piriforme]                                   | 7.00E-76  |
|                              | Srp1        | YNL189W                         | UABAM_02812                                                                            | 0.000000279 | TIR domain-containing protein [Microcystis aeruginosa]                                         | 2.00E-143 |
| Clusters of unknown proteins | Msi1        | YBR195C                         | UABAM_01649                                                                            | 4.78E-11    | nacht and wd40 domain protein, partial [Umbilicaria pustulata]                                 | 0         |
|                              | Rsa2        | YMR131C                         | UABAM_04730                                                                            | 1.62E-08    | NACHT nucleoside triphosphatase [Penicillium camemberti]                                       | 0         |
|                              | Ykl121w     | YKL121W                         | UABAM_01336                                                                            | 2.02E-11    | putative WD repeat-containing protein, partial [Alternaria tenuissima]                         | 2.00E-169 |
|                              | Ymr102c     | YMR102C                         | UABAM_05614                                                                            | 4.77E-11    | putative WD repeat-containing protein, partial [Alternaria tenuissima]                         | 1.00E-90  |
|                              | Yor289w     | YOR289W                         | UABAM_03205                                                                            | 1.13E-14    | AmmeMemoRadiSam system protein A [delta proteobacterium PSCGC 5296]                            | 3.00E-45  |
|                              | Yer082c     | YER082C                         | UABAM_04296                                                                            | 1.47E-10    | (Myosin heavy-chain) kinase., Histone acetyltransferase [Haliscomenobacter hydrossis DSM 1100] | 0         |
|                              | Ypl247c     | YPL247C                         | UABAM_02051                                                                            | 0.00000013  | tetratricopeptide repeat protein [Ktedonobacter racemifer]                                     | 0         |
|                              | Ypl236c     | YPL236C                         | UABAM_06120                                                                            | 6.39E-12    | Serine/threonine-protein kinase PknB [Planctomyces sp. SH-PL14]                                | 8.00E-91  |
|                              | Ylr409c     | YLR409C                         | UABAM_04996                                                                            | 1.86E-19    | (Myosin heavy-chain) kinase., Histone acetyltransferase [Haliscomenobacter hydrossis DSM 1100] | 0         |
|                              | Ymr068w     | YMR068W                         | UABAM_02159                                                                            | 0.000000371 | ankyrin repeat domain-containing protein [Fischerella sp. PCC 9605]                            | 7.00E-49  |
|                              | Ptk1        | YKL198C                         | UABAM_02156                                                                            | 1.92E-18    | serine/threonine protein kinase [Candidatus Solibacter usitatus Ellin6076]                     | 4.00E-50  |

Eukaryotic sequence are highlighted in yellow.



**Supplementary table 8 | Results of the feeding experiments of *-Ca. Uab amorphum***

| Taxonomic group          | Species                           | Strain      | Gram staining | feeding |
|--------------------------|-----------------------------------|-------------|---------------|---------|
| Bacteria, Proteobacteria | <i>Alteromonas macleodii</i>      | NBRC 102226 | negative      | +       |
| Bacteria, Proteobacteria | <i>Escherichia coli</i>           | TOP10       | negative      | +       |
| Bacteria, Firmicutes     | <i>Lactobacillus farciminis</i>   | JCM 1097    | positive      | +       |
| Bacteria, Firmicutes     | <i>Staphylococcus condimentii</i> | JCM 6074    | positive      | +       |
| Eukarya, Chlorophyta     | <i>Bathycoccus prasinus</i>       | NIES-2670   | n/a           | +       |
| Eukarya, Fungi           | <i>Debaryomyces hansenii</i>      | JCM 1439    | n/a           | -       |

**Supplementary Table 9 | Proteins of *Ec0Uab amorphum* that are putatively involved with digestion.**

|                              | protein ID  | gene name                          | EC number | putative protein localization* |
|------------------------------|-------------|------------------------------------|-----------|--------------------------------|
| Sugar (glycogen) degradation | UABAM_05595 | $\alpha$ -amylase                  | 3.2.1.1   | Extracellular                  |
|                              | UABAM_05988 | $\alpha$ -amylase                  | 3.2.1.1   | Extracellular                  |
| Protein digestion            | UABAM_06464 | carboxypeptidase                   | 3.4.17.15 | Outer membrane                 |
|                              | UABAM_04121 | S9 family peptidase                | 3.4.14.5  | Extracellular                  |
| Phospholipid digestion       | UABAM_00798 | Phospholipase C                    | 3.1.4.3   | Extracellular                  |
| DNA/RNA digestion            | UABAM_04815 | Deoxyribonuclease I                | 3.1.21.1  | Extracellular                  |
|                              | UABAM_00289 | 5'-nucleotidase                    | 3.1.3.5   | Outer membrane                 |
| Peptidoglycan digestion      | UABAM_06081 | N-acetylmuramoyl-L-alanine amidase | 3.5.1.28  | Extracellular                  |

\*predicted by Psortb, Cello, and LocTree3

Supplementary Table 10 | Proteins putatively related to antibiotic resistance

| protein ID  | eggNOG annotation                                                                         | HGT (HGTECTOR)*                                               |
|-------------|-------------------------------------------------------------------------------------------|---------------------------------------------------------------|
| UABAM_01413 | multidrug transporter AcrB                                                                | 1929465 ( <i>Idiomarina</i> sp. 5.13)                         |
| UABAM_01641 | multidrug transporter AcrB                                                                | 765910 ( <i>Marichromatium purpuratum</i> 984)                |
| UABAM_02753 | multidrug transporter AcrB                                                                |                                                               |
| UABAM_03431 | multidrug transporter AcrB                                                                | 1544451 ( <i>Thalassospira</i> sp. TSL5-1)                    |
| UABAM_05788 | multidrug transporter AcrB                                                                |                                                               |
| UABAM_06233 | multidrug transporter AcrB                                                                | 207559 ( <i>Desulfovibrio alaskensis</i> G20)                 |
| UABAM_00787 | AcrB AcrD AcrF family protein                                                             | 1305731 ( <i>Marinobacter excellens</i> HL-55)                |
| UABAM_05187 | AcrB/AcrD/AcrF family                                                                     | 880073 ( <i>Caldithrix abyssi</i> DSM 13497)                  |
| UABAM_02471 | AcrB/AcrD/AcrF family                                                                     | 880073 ( <i>Caldithrix abyssi</i> DSM 13497)                  |
| UABAM_00787 | acriflavin resistance protein                                                             | 1305731 ( <i>Marinobacter excellens</i> HL-55)                |
| UABAM_01648 | acriflavin resistance protein                                                             |                                                               |
| UABAM_03870 | acriflavin resistance protein                                                             |                                                               |
| UABAM_04012 | acriflavin resistance protein                                                             |                                                               |
| UABAM_04776 | acriflavin resistance protein                                                             | 1121391 ( <i>Desulfacinum infernum</i> DSM 9756)              |
| UABAM_06283 | acriflavin resistance protein                                                             |                                                               |
| UABAM_02128 | acriflavine resistance protein B                                                          | 1266370 ( <i>Nitrospina gracilis</i> 3/211)                   |
| UABAM_03163 | aminoglycoside phosphotransferase                                                         | 1821260 ( <i>Bacillus</i> sp. NC2-31)                         |
| UABAM_04125 | aminoglycoside phosphotransferase                                                         |                                                               |
| UABAM_06663 | aminoglycoside phosphotransferase                                                         |                                                               |
| UABAM_00313 | beta-lactamase                                                                            |                                                               |
| UABAM_00445 | beta-lactamase                                                                            |                                                               |
| UABAM_00904 | beta-lactamase                                                                            | 1664068 ( <i>bacterium</i> 336/3)                             |
| UABAM_01671 | beta-lactamase                                                                            |                                                               |
| UABAM_03436 | beta-lactamase                                                                            |                                                               |
| UABAM_03539 | beta-lactamase                                                                            | 309807 ( <i>Salinibacter ruber</i> DSM 13855)                 |
| UABAM_04228 | beta-lactamase                                                                            | 1302690 ( <i>Cnuella takakiae</i> )                           |
| UABAM_04234 | beta-lactamase                                                                            | 1173024 ( <i>Fischerella</i> sp. PCC 9605)                    |
| UABAM_05381 | beta-lactamase                                                                            | 1123277 ( <i>Spirosoma panaciterrae</i> DSM 21099)            |
| UABAM_05443 | beta-lactamase                                                                            | 402881 ( <i>Parvibaculum lavamentivorans</i> DS-1)            |
| UABAM_06005 | beta-lactamase                                                                            | 1997 ( <i>Microtetraspora fusca</i> )                         |
| UABAM_00326 | beta-lactamase domain protein                                                             | 1246637 ( <i>Desulfamplus magnetovallimortis</i> )            |
| UABAM_00939 | beta-lactamase domain protein                                                             | 1235591 ( <i>Pseudorhodoplanes sinuspersici</i> )             |
| UABAM_01747 | beta-lactamase domain protein                                                             | 1286635 ( <i>Desulfotignum phosphitoxidans</i> DSM 13687)     |
| UABAM_01963 | beta-lactamase domain protein                                                             | 1633631 ( <i>Candidatus Kryptonium thompsoni</i> )            |
| UABAM_06106 | beta-lactamase domain-containing protein                                                  | 1150474 ( <i>Mesoaciditoga lauensis</i> cd-1655R = DSM 25116) |
| UABAM_00685 | lactamase_B                                                                               | 927787 ( <i>Microbulbifer mangrovi</i> )                      |
| UABAM_00892 | metallo-beta-lactamase                                                                    | 675511 ( <i>Methylomicrobium buryatense</i> 5G)               |
| UABAM_05568 | metallo-beta-lactamase                                                                    | 1201290 ( <i>Bacteriovorax</i> sp. BAL6_X)                    |
| UABAM_00823 | metallo-beta-lactamase superfamily                                                        |                                                               |
| UABAM_03770 | metallo-beta-lactamase superfamily                                                        | 1664068 ( <i>bacterium</i> 336/3)                             |
| UABAM_05072 | metallo-beta-lactamase superfamily                                                        | 1958811 ( <i>Leptospira</i> sp. CLM-U50)                      |
| UABAM_05384 | metallo-beta-lactamase superfamily                                                        | 1184267 ( <i>Bdellovibrio exovorax</i> JSS)                   |
| UABAM_06572 | metallo-beta-lactamase superfamily                                                        |                                                               |
| UABAM_00820 | cation multidrug efflux pump                                                              |                                                               |
| UABAM_02165 | chloramphenicol acetyltransferase                                                         | 318464 ( <i>Clostridium sulfidigenes</i> )                    |
| UABAM_00466 | chloramphenicol resistance protein                                                        | 1498499 ( <i>Legionella norrlandica</i> )                     |
| UABAM_05970 | MATE efflux family protein                                                                | 1122189 ( <i>Malonomonas rubra</i> DSM 5091)                  |
| UABAM_05659 | MATE efflux family protein                                                                | 926566 ( <i>Terriglobus roseus</i> DSM 18391)                 |
| UABAM_03864 | MATE efflux family protein                                                                | 262489 ( <i>delta proteobacterium</i> MLMS-1)                 |
| UABAM_00859 | MATE efflux family protein                                                                | 1192034 ( <i>Chondromyces apiculatus</i> DSM 436)             |
| UABAM_01667 | multidrug resistance protein                                                              |                                                               |
| UABAM_05343 | multidrug resistance protein                                                              |                                                               |
| UABAM_04245 | multidrug resistance protein msba                                                         |                                                               |
| UABAM_05659 | putative multidrug resistance protein NorM                                                |                                                               |
| UABAM_01784 | tetracycline efflux Na <sup>+</sup> /H <sup>+</sup> antiporter family transporter Tet(35) | 1121429 ( <i>Desulfotomaculum putei</i> DSM 12395)            |
| UABAM_06437 | tetracycline resistance MFS efflux pump                                                   | 1849360 ( <i>Balneola</i> sp. EhC07)                          |

\* NCBI taxon ID and name of related taxa are shown.

**Supplementary Table 11 | Actin binding proteins in *Ec. Uab amorphum* genome**

| Gene symbol | <i>S. cerevisiae</i> protein ID | blastp querying <i>S. cerevisiae</i> proteins against <i>Ec. Uab amorphum</i> proteins |          | blastp querying <i>Ec. Uab amorphum</i> proteins against NCBI nr database                      |          |
|-------------|---------------------------------|----------------------------------------------------------------------------------------|----------|------------------------------------------------------------------------------------------------|----------|
|             |                                 | blast top hit ( <i>Ec. Uab amorphum</i> proteins)                                      | e-value  | blast top hit (nr) (removing hypothetical proteins and data from metagenome)                   | e-value  |
| Abp1        | YCR088W                         | (no hit)                                                                               |          |                                                                                                |          |
| Abp140      | YOR239W                         | (no hit)                                                                               |          |                                                                                                |          |
| Aip1        | YMR092C                         | UABAM_01722                                                                            | 9.71E-12 | TIR domain-containing protein [Sorangium cellulosum]                                           | 1.00E-84 |
| Bni1        | YNL271C                         | (no hit)                                                                               |          |                                                                                                |          |
| Bnr1        | YIL159W                         | (no hit)                                                                               |          |                                                                                                |          |
| Cap1        | YKL007W                         | (no hit)                                                                               |          |                                                                                                |          |
| Cap2        | YIL034C                         | (no hit)                                                                               |          |                                                                                                |          |
| Crm1        | YLR429W                         | UABAM_04996                                                                            | 1.50E-18 | (Myosin heavy-chain) kinase., Histone acetyltransferase [Haliscomenobacter hydrossis DSM 1100] | 0        |
| Iqg1/Cyk1   | YPL242C                         | (no hit)                                                                               |          |                                                                                                |          |
| Myo5        | YMR109W                         | (no hit)                                                                               |          |                                                                                                |          |
| Myo1        | YHR023W                         | (no hit)                                                                               |          |                                                                                                |          |
| Myo2        | YOR326W                         | (no hit)                                                                               |          |                                                                                                |          |
| Myo4        | YAL029C                         | (no hit)                                                                               |          |                                                                                                |          |
| Pan1        | YIR006C                         | (no hit)                                                                               |          |                                                                                                |          |
| Sac6        | YDR129C                         | (no hit)                                                                               |          |                                                                                                |          |
| Scp1        | YOR367W                         | (no hit)                                                                               |          |                                                                                                |          |
| Sla2        | YNL243W                         | (no hit)                                                                               |          |                                                                                                |          |
| Tpm1        | YNL079C                         | (no hit)                                                                               |          |                                                                                                |          |
| Tpm2        | YIL138C                         | (no hit)                                                                               |          |                                                                                                |          |
| Bud6/Aip3   | YLR319C                         | (no hit)                                                                               |          |                                                                                                |          |
| Las17/Bee1  | YOR181W                         | (no hit)                                                                               |          |                                                                                                |          |
| Pfy1        | YOR122C                         | (no hit)                                                                               |          |                                                                                                |          |
| Srv2        | YNL138W                         | (no hit)                                                                               |          |                                                                                                |          |
| Cof1        | YLL050C                         | (no hit)                                                                               |          |                                                                                                |          |
| Twf1        | YGR080W                         | (no hit)                                                                               |          |                                                                                                |          |
| Vrp1        | YLR337C                         | (no hit)                                                                               |          |                                                                                                |          |

**Supplementary Table 12 | Oligonucleotide probes used in the fluorescent in situ hybridization**

| probe name | sequence (5'-3')          | binding position in <i>Escherichia coli</i> 16S | amount of formamide* | reference |
|------------|---------------------------|-------------------------------------------------|----------------------|-----------|
| EUB338     | GCT GCC TCC CGT AGG AGT   | 338–355                                         | 0                    | 1         |
| PLA886†    | GCC TTG CGA CCA TAC TCC C | 886–904                                         | 35%                  | 2         |

\* Formamide concentrations optimised in references are used in this study.

† Hybridised with equimolar amount of competitor oligonucleotide cPLA886 (5' GCC TTG CGA CCG TAC TCC C 3') to avoid binding to nontarget bacteria.

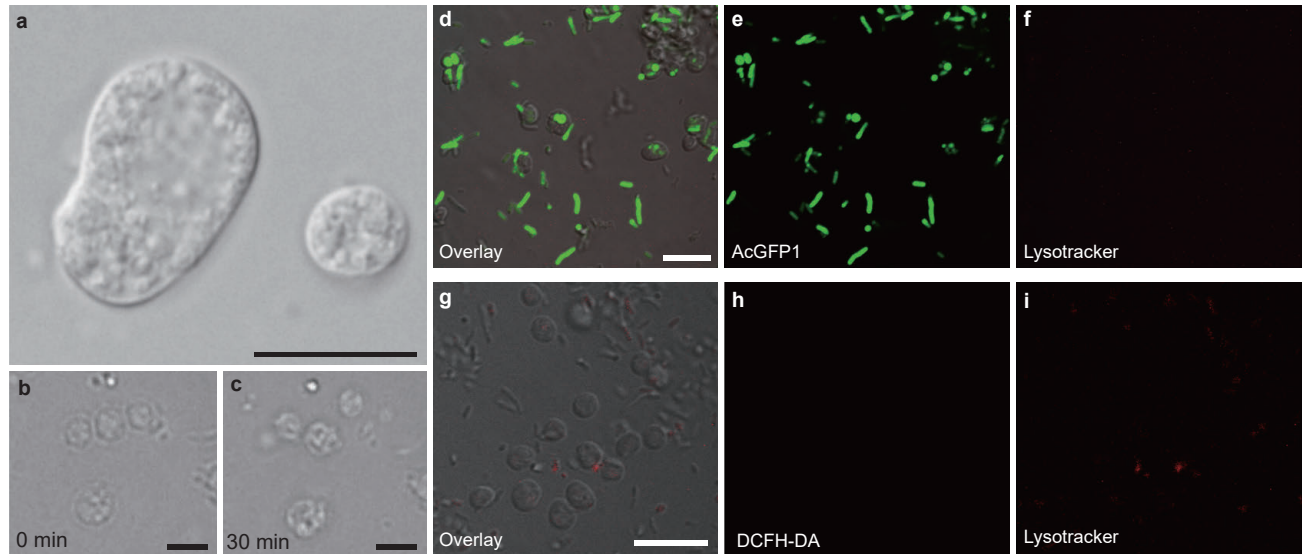

**Supplementary Figure 1 | Light and fluorescent micrographs of *Candidatus Uab amorphum***  
**(a)** Light micrograph of large cell of *C. Uab amorphum* **(b,c)** Selected images of time-lapse video micrographs showing immotile cells under sodium azide. **(d–f)** Confocal fluorescent micrographs showing that low pH (red) signal is not observed in cells and does not overlap with AcGFP1 signal of engulfed *Escherichia coli*. **(g–i)** Confocal fluorescent micrographs showing there is no low pH signal (red) and reactive oxygen species (green) signal in cells. Scale bars, 10  $\mu\text{m}$  **(a,d–i)** and 5  $\mu\text{m}$  **(b,c)**.

a

**EUB338**

Probe sequence 3'- TGAGGATGCCCTCCGTCCG-5'

Target sequence 5'- ACUCCUACGGGAGGCAGC-3'

**Contig 1 (= *Ca. Uab amorphum*)** =====

Contig 2 (= prey bacterium) =====

Contig 3 (= prey bacterium) =====

Contig 4 (= prey bacterium) =====

Contig 5 (= prey bacterium) =====

Contig 6 (= prey bacterium) =====

*Escherichia coli* =====

**PLA886**

Probe sequence 3'- CCCTCATACCAGCGTTCCG-5'

Target sequence 5'- GGGAGUAUGGUCGCAAGGC-3'

**Contig 1 (*Ca. Uab amorphum*)** =====

Contig 2 (= prey bacterium) ===== C ===== A T

Contig 3 (= prey bacterium) ===== C = C ===== T

Contig 4 (= prey bacterium) ===== C = C ===== T

Contig 5 (= prey bacterium) ===== C = C ===== T

Contig 6 (= prey bacterium) ===== C ===== A T

*Escherichia coli* ===== C = C ===== T

b

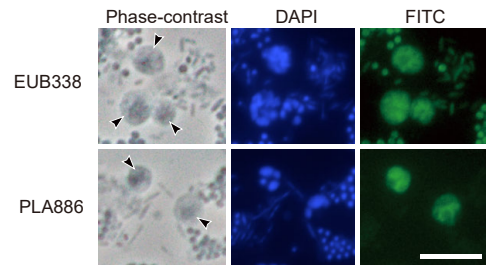

**Supplementary Figure 2 | Fluorescence in situ hybridization experiment on *Candidatus Uab amorphum* and prey bacteria cells in co-culture. (a)** Alignments of oligonucleotide probes and 16S rRNA gene sequences derived from a xenoculture of *C. Uab amorphum* (b) Fluorescent micrographs of the xenoculture of *C. Uab amorphum* using oligonucleotide probes EUB338 (upper) and PLA886 (lower). EUB338 stained all bacterial cells in the culture. PLA886 stained cells of *C. Uab amorphum*. Arrowheads indicate cells of *C. Uab amorphum*

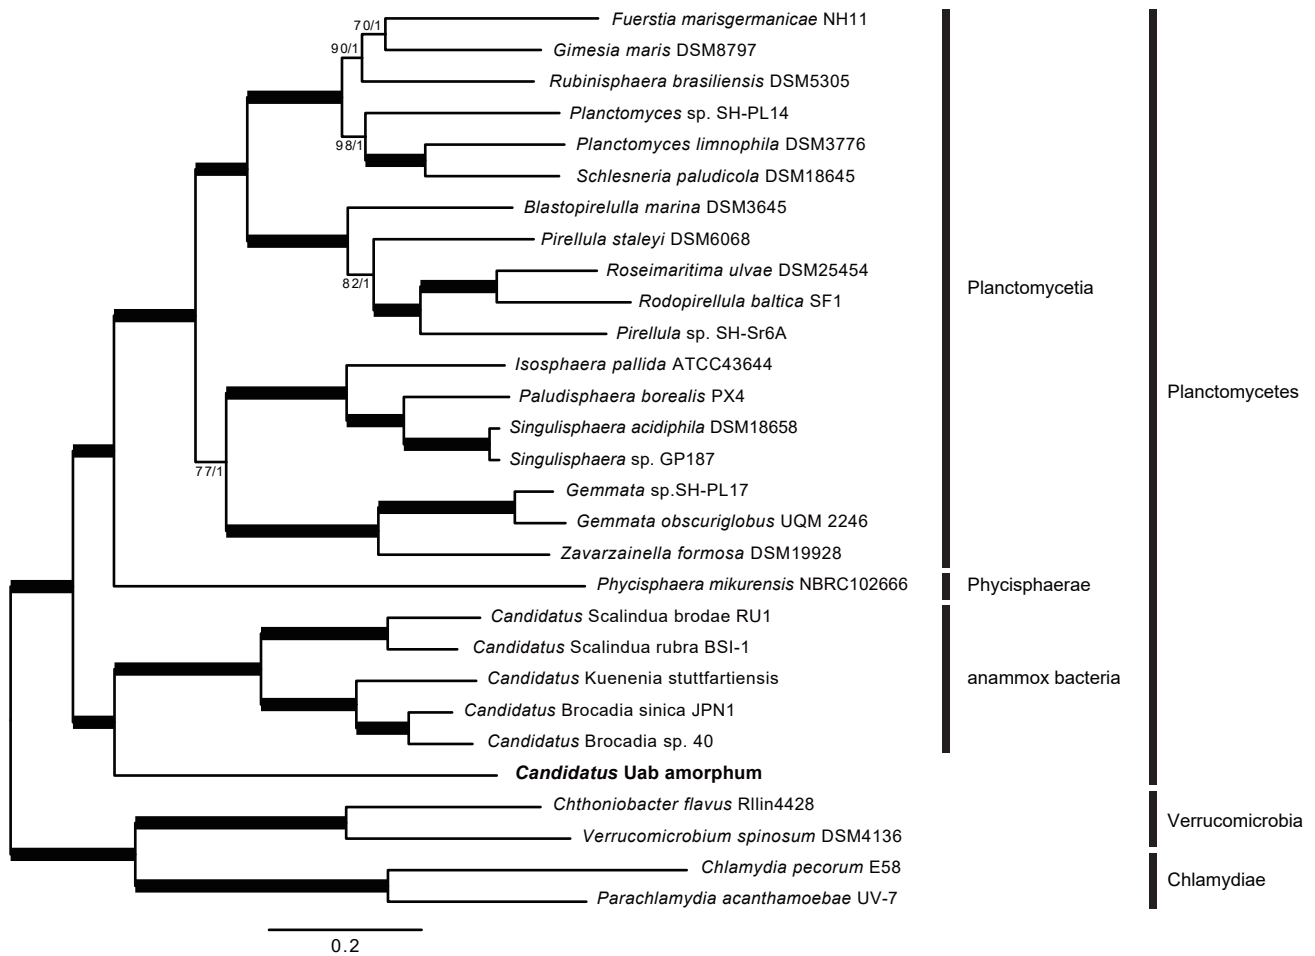

**Supplementary Figure 3 | Maximum likelihood tree of 171 proteins.** The tree was inferred from 52,272 amino acid positions of 29 taxa. Left and right values on nodes indicate bootstrap value and Bayesian posterior probability, respectively. Bold branches indicate maximum supports of both bootstrap value and Bayesian posterior probability. Scale bar indicates nucleotide substitution rate per site.



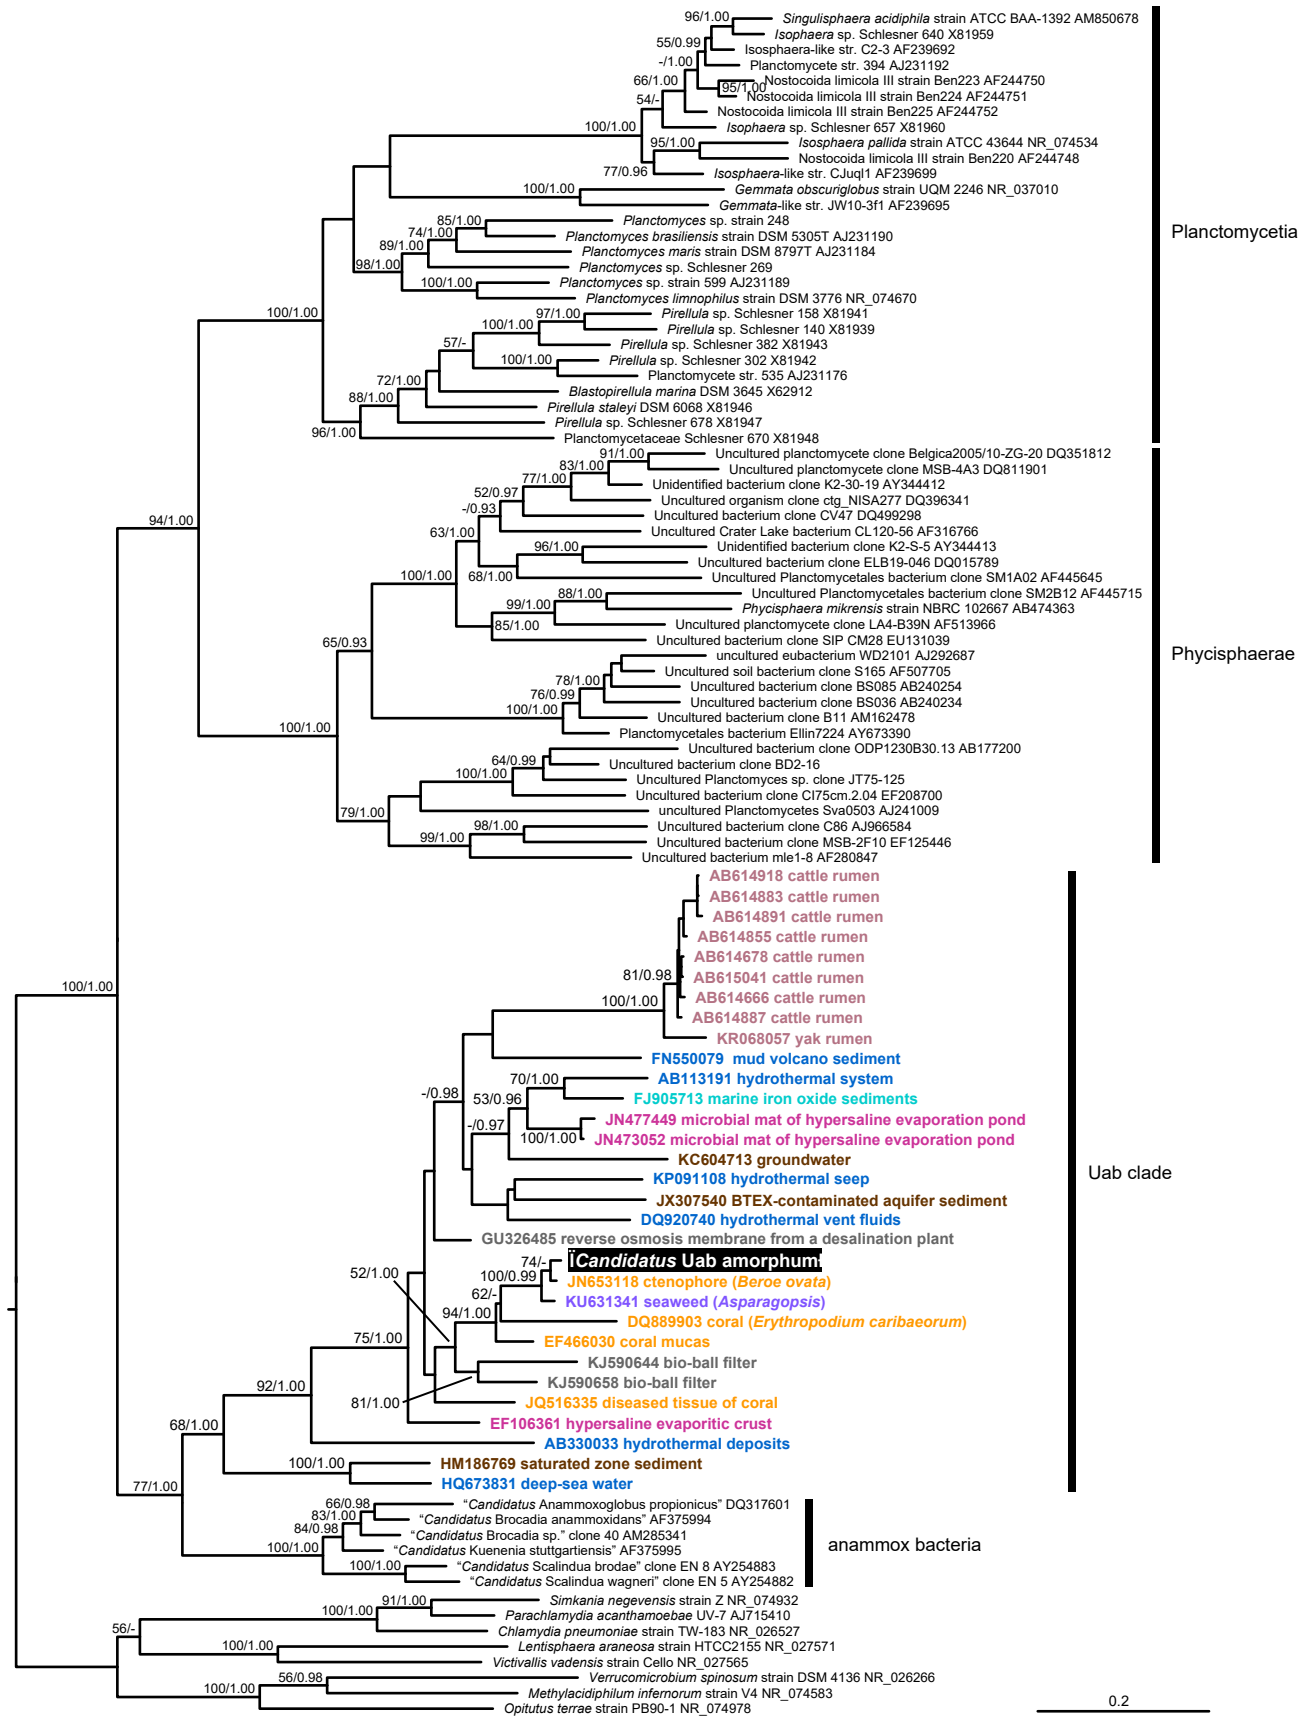

**Supplementary Figure 4 | Maximum likelihood tree of 16S rRNA gene sequences including environmental sequences close to *Candidatus Uab amorphum*** The tree was inferred from 1,351 nucleotide positions of 100 taxa. Left and right values on nodes indicate bootstrap value and Bayesian posterior probability, respectively. Scale bar indicates nucleotide substitution rate per site.

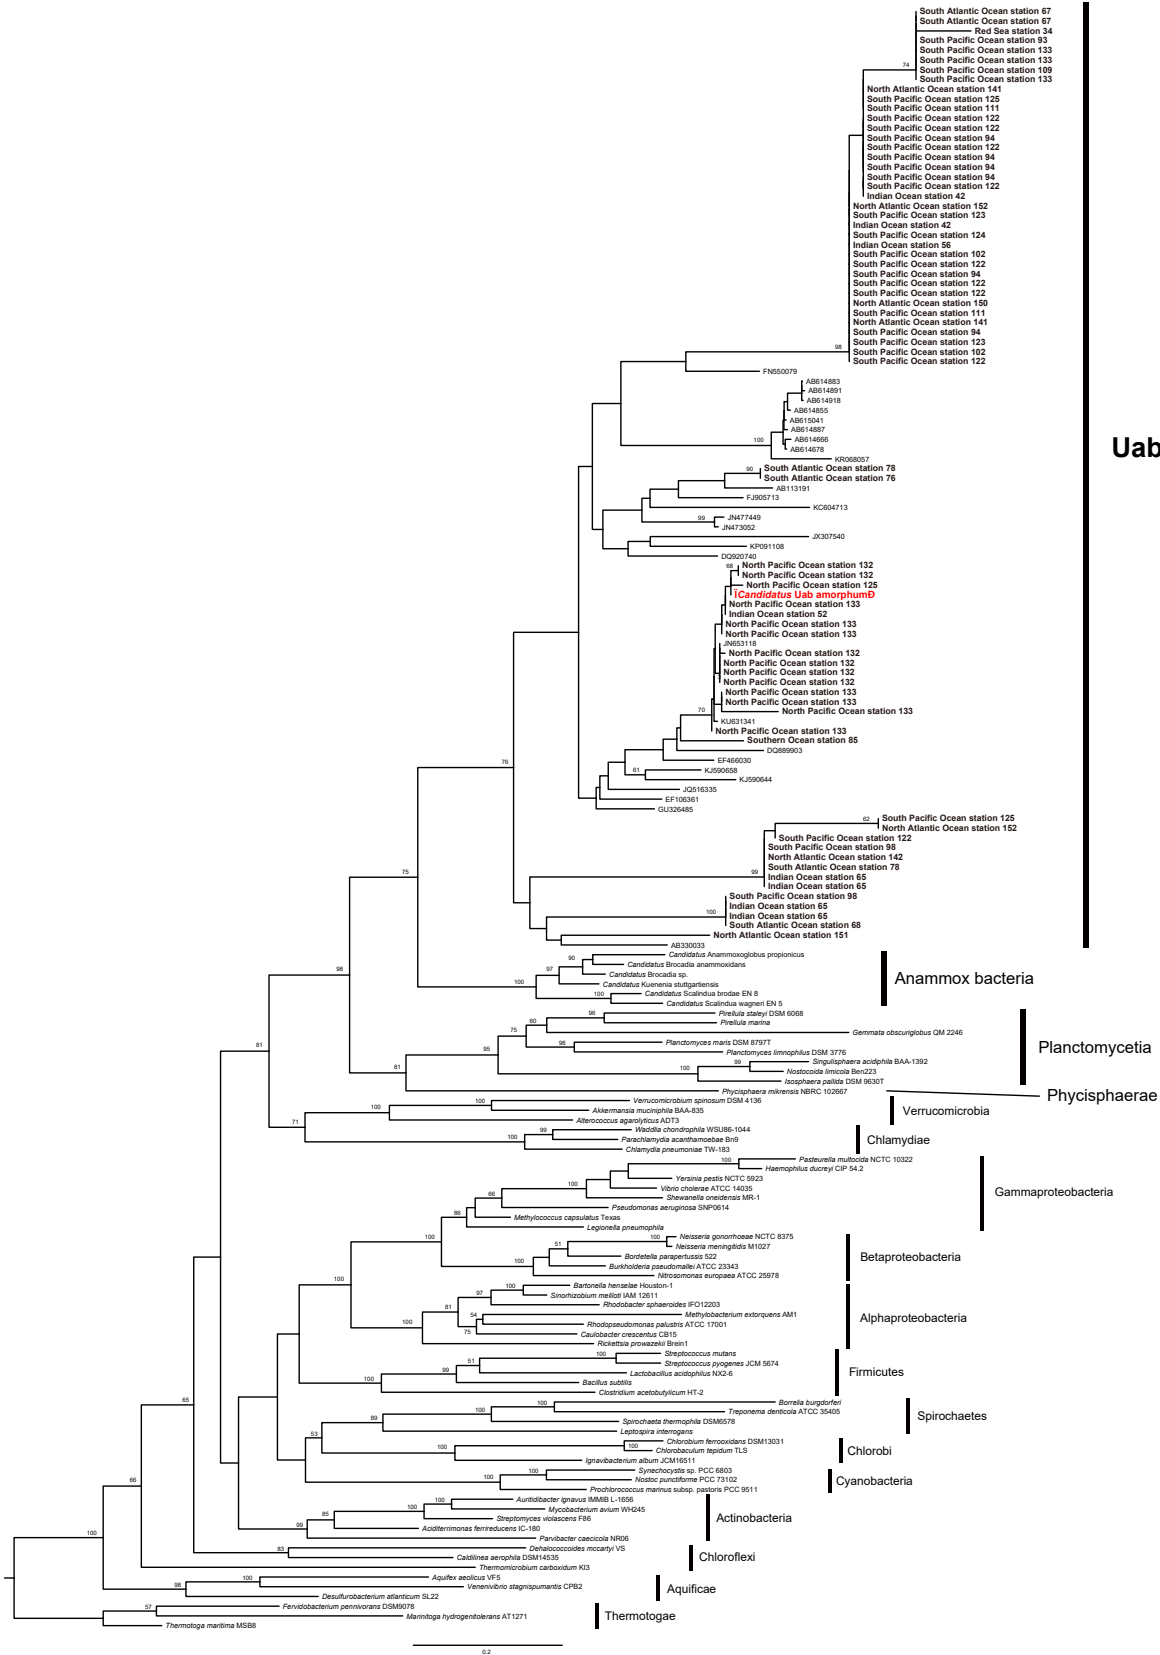

**Supplementary Figure 5 | Maximum likelihood tree of 16S rRNA gene sequences including environmental sequences close to *Candidatus Uab amorphum*** The tree was inferred from 1,509 nucleotide positions of 167 taxa. Taxa in bold type show the sequences from Tara oceans expedition. Left and right values on nodes indicate bootstrap value and Bayesian posterior probability, respectively. Scale bar indicates nucleotide substitution rate per site.

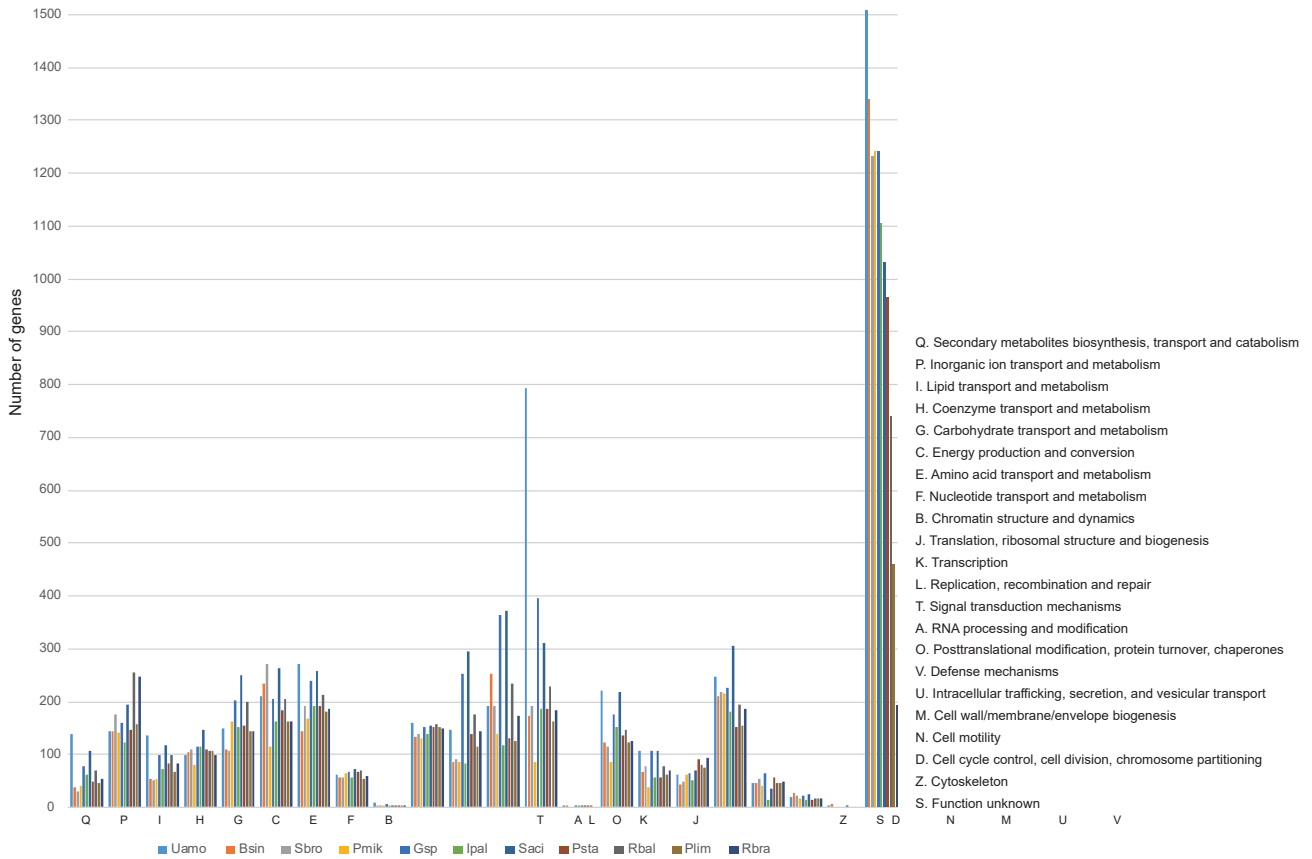

**Supplementary Figure 6 | Comparison of COG category between *Candidatus Uab amorphum* and nine planctomycetes.** Uamo; *Candidatus Uab amorphum*; Bsin; *Candidatus Brocadia sinica*; Sbro; *Candidatus Scalindua brodae*. Pmik; *Phycisphaera mikurensis*. Gsp; *Gemmata* sp. Ipal; *Isosphaera pallida*. Saci; *Singulisphaera acidiphila*. Psta; *Pirellula staley*. Rbal; *Rhodopirellula baltica*. Plim; *Planctopirus limnophila*. Rbra; *Rubinisphaera brasiliensis*.

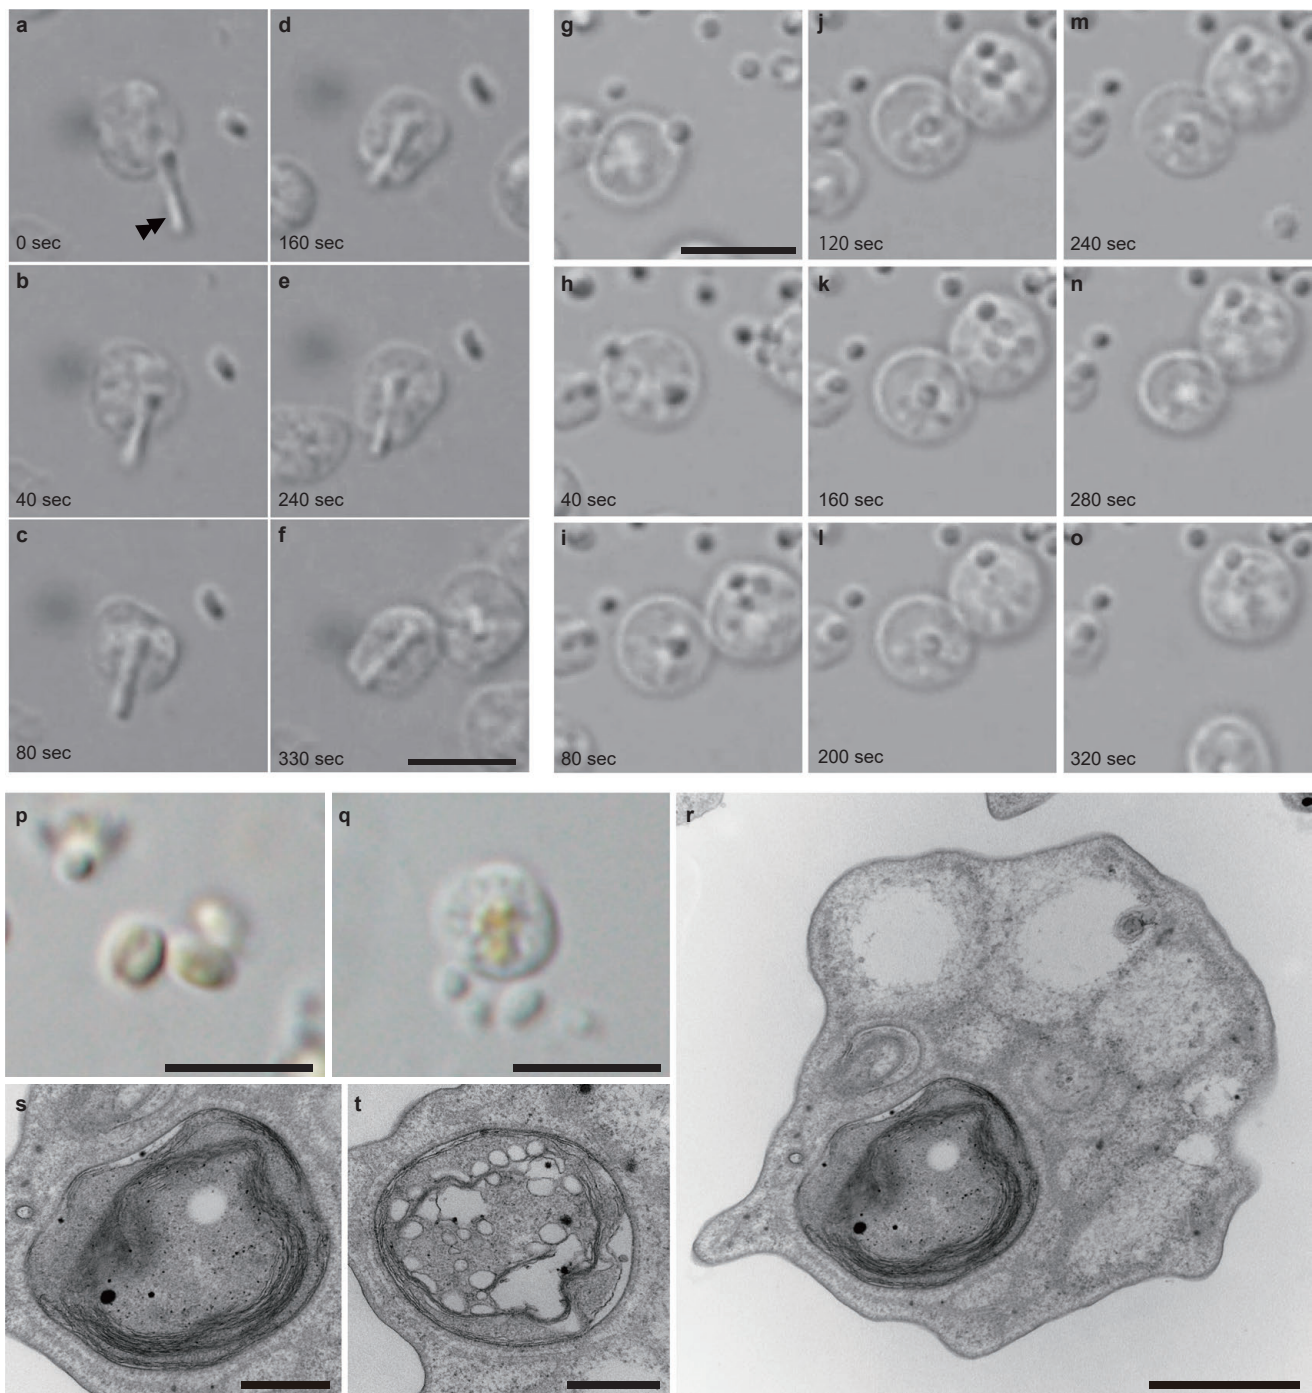

**Supplementary Figure 7 | Light and electron micrographs of *Candidatus Uab amorphumø* that engulfs Gram-positive bacteria and eukaryote. (a–f)** Selected images of time-lapse video showing that *Ca. Uab amorphumø* engulfs *Lactobacillus farciminis*. Double arrowhead indicate an engulfed cell of *Lactobacillus farciminis*. **(g–o)** Selected images of time-lapse video showing that *Ca. Uab amorphumø* engulfs *Staphylococcus condimentii*. Double arrowhead indicate an engulfed cell of *Staphylococcus condimentii* **(p)** Light micrograph of *Bathycoccus prasinos*. **(q)** Light micrograph of *Ca. Uab amorphumø* that engulfs *B. prasinos*. **(r)** Transmission electron micrograph of the phagosome-like vacuole (PV) of which includes intact *B. prasinos* cell. **(s)** PV including intact *B. prasinos* cell. **(t)** PV including disrupted *B. prasinos* cell. Scale bars, 5  $\mu\text{m}$  (a–q), 1  $\mu\text{m}$  (r), and 500 nm (s,t).

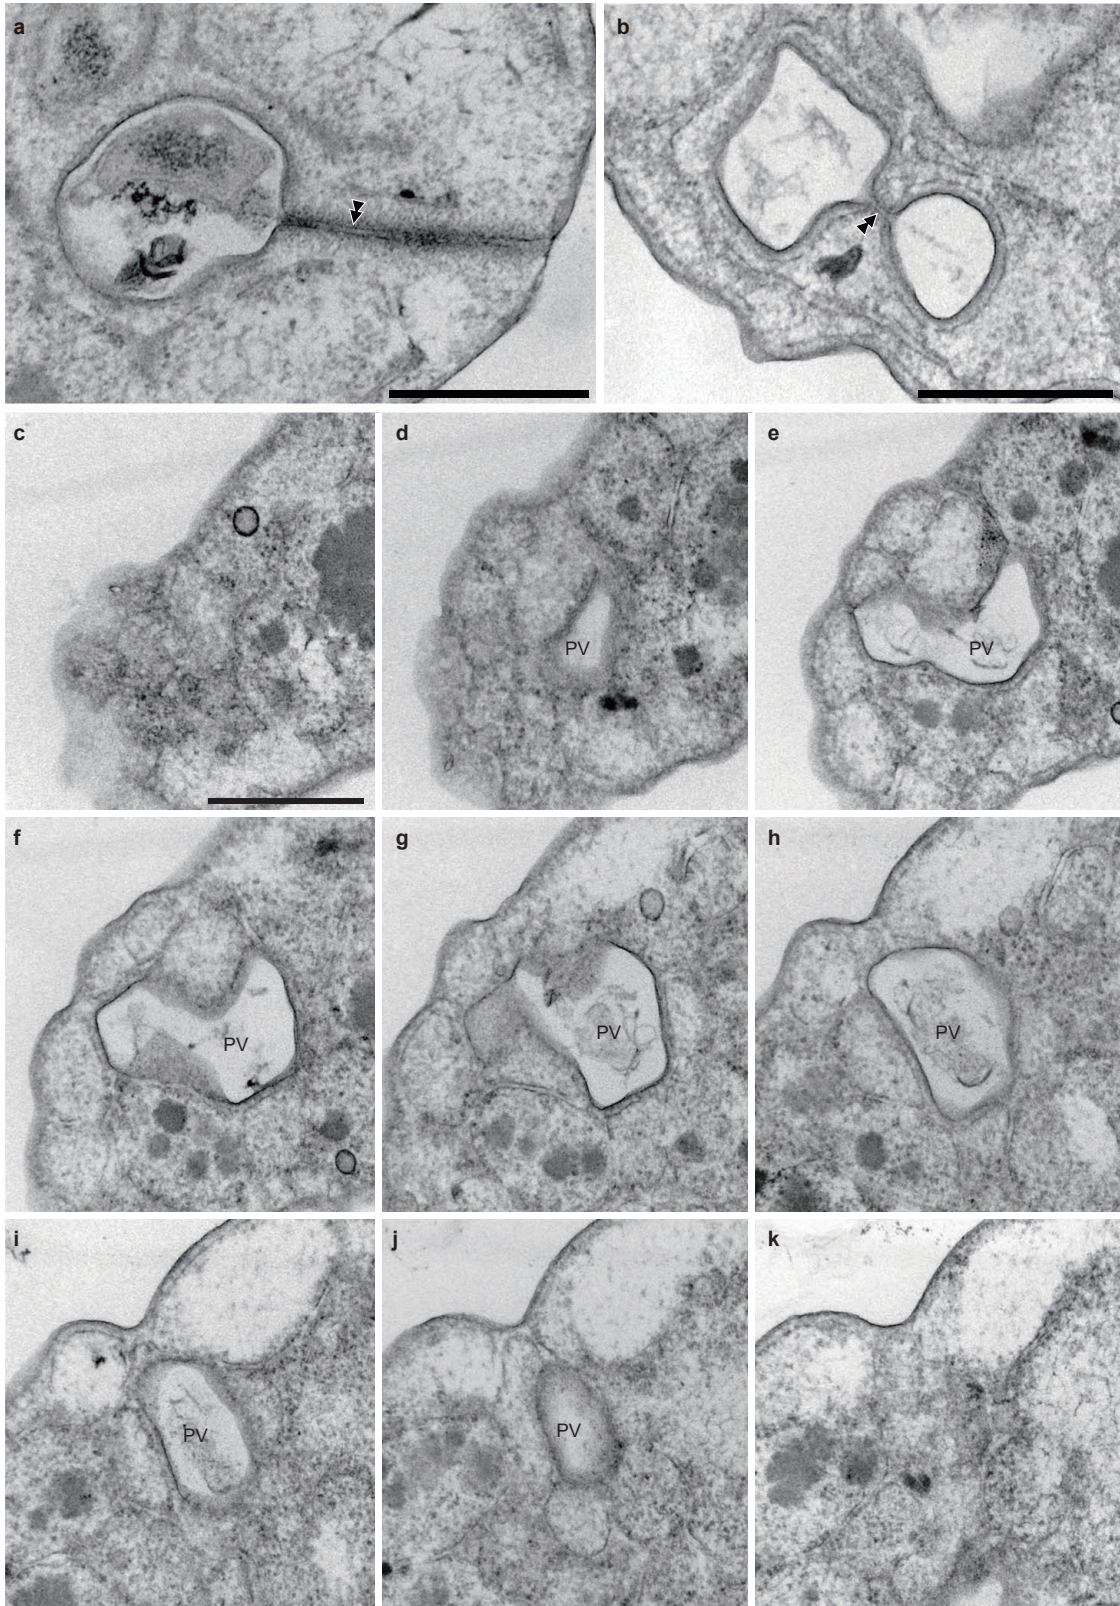

**Supplementary Figure 8 | Transmission electron micrographs of phagosome-like vacuoles (PVs).** (a) Duct (double arrowhead) connecting PV with outside of the cell. (b) Duct (double arrowhead) connecting two PVs. (c–k) Serial sections of 70 nm thickness showing a PV without duct. Scale bars, 500 nm (a,b) and 200 nm (c–k)

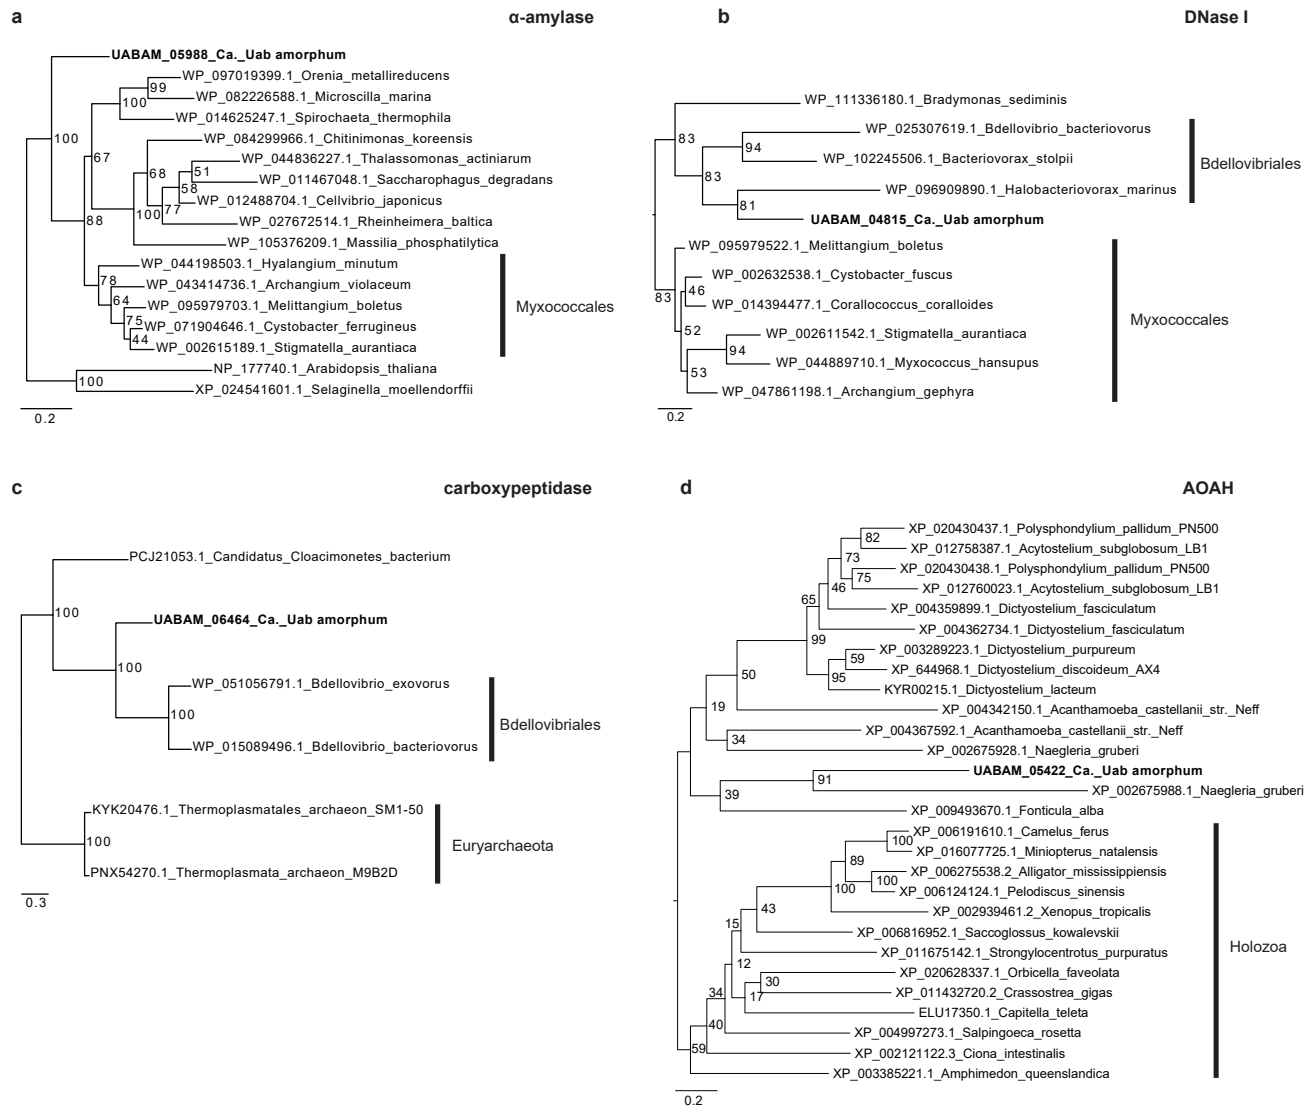

**Supplementary Figure 9 | Maximum likelihood trees of digestive proteins putatively secreted or localized at the outer membrane. (a)** Tree of  $\alpha$ -amylase inferred from 331 amino acids of 17 OTUs. **(b)** Tree of DNase I inferred from 173 amino acids of 11 OTUs. **(c)** Tree of carboxypeptidase inferred from 206 amino acids of 6 OTUs. **(d)** Tree of acyloxyacyl hydrolase (AOAH) inferred from 534 amino acids of 28 OTUs. Bootstrap values are shown on nodes. Scale bars indicate nucleotide substitution rate per site.

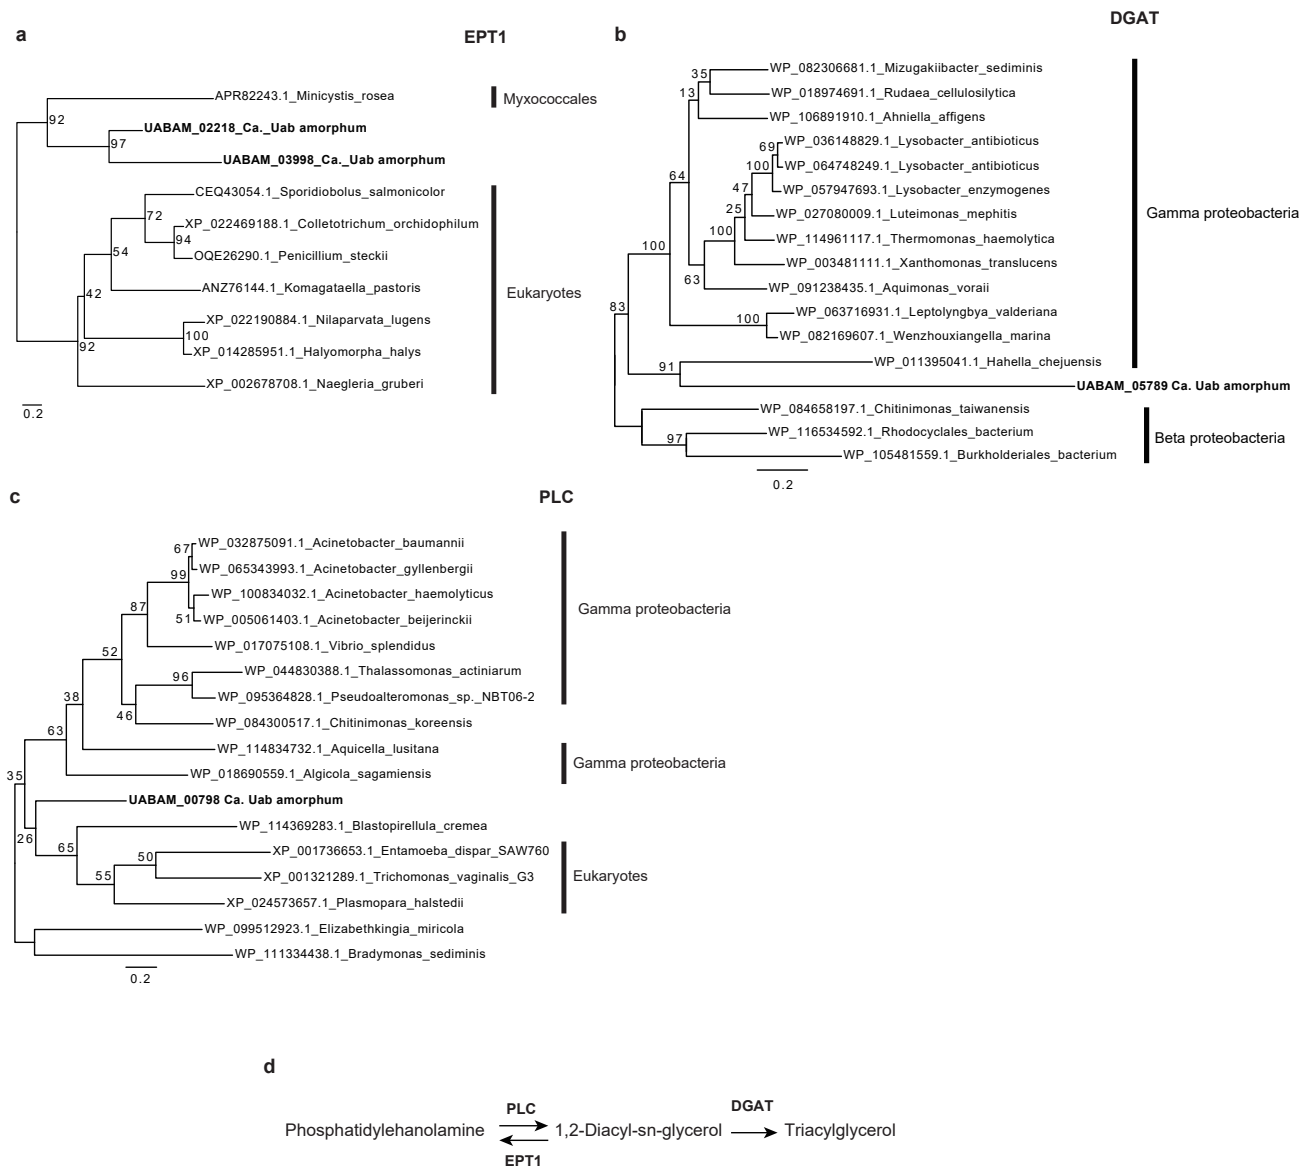

**Supplementary Figure 10 | Maximum likelihood trees of proteins involved with lipid metabolism.** (a) Tree of ethanolamine phosphotransferase (EPT1) inferred from 154 amino acids of 10 OTUs. (b) Tree of diacylglycerol acyltransferase (DGAT) inferred from 408 amino acids of 17 OTUs. (c) Tree of phospholipase c (PLC) inferred from 225 amino acids of 17 OTUs. Bootstrap values are shown on nodes. (d) Inferred metabolic pathway between phosphatidylethanolamine and triacylglycerol. Scale bars indicate nucleotide substitution rate per site.

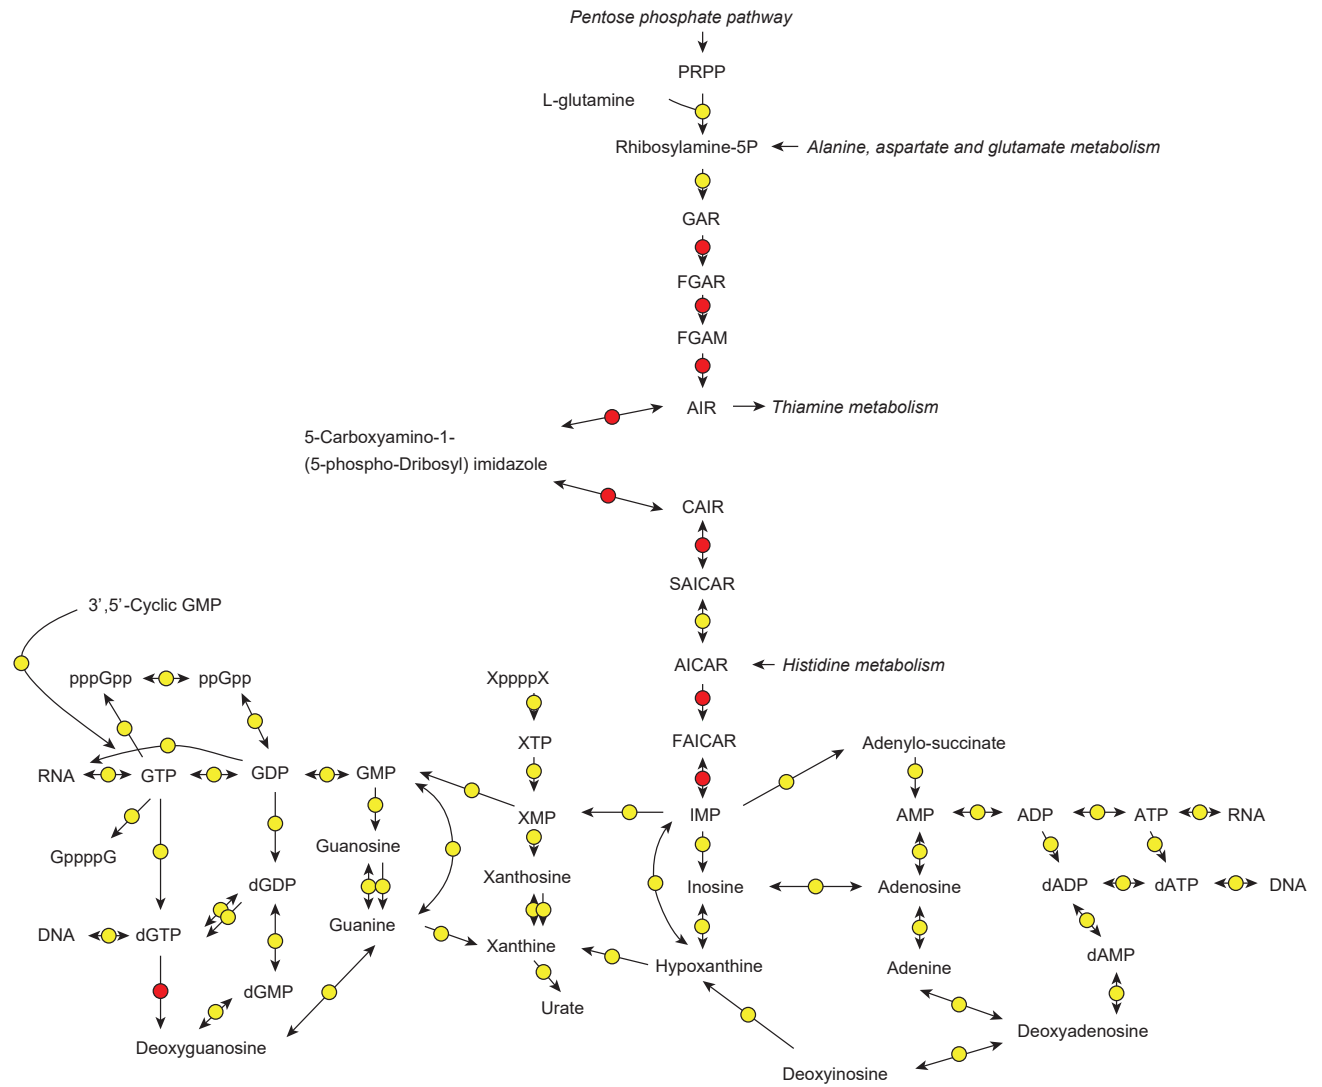

**Supplementary Figure 11 | Biosynthesis pathway of purine nucleotides in ‘*Candidatus Uab amorphum*’.** Red circles indicate genes absent in ‘*Ca. Uab amorphum*’. Yellow circles indicate genes present in ‘*Ca. Uab amorphum*’.



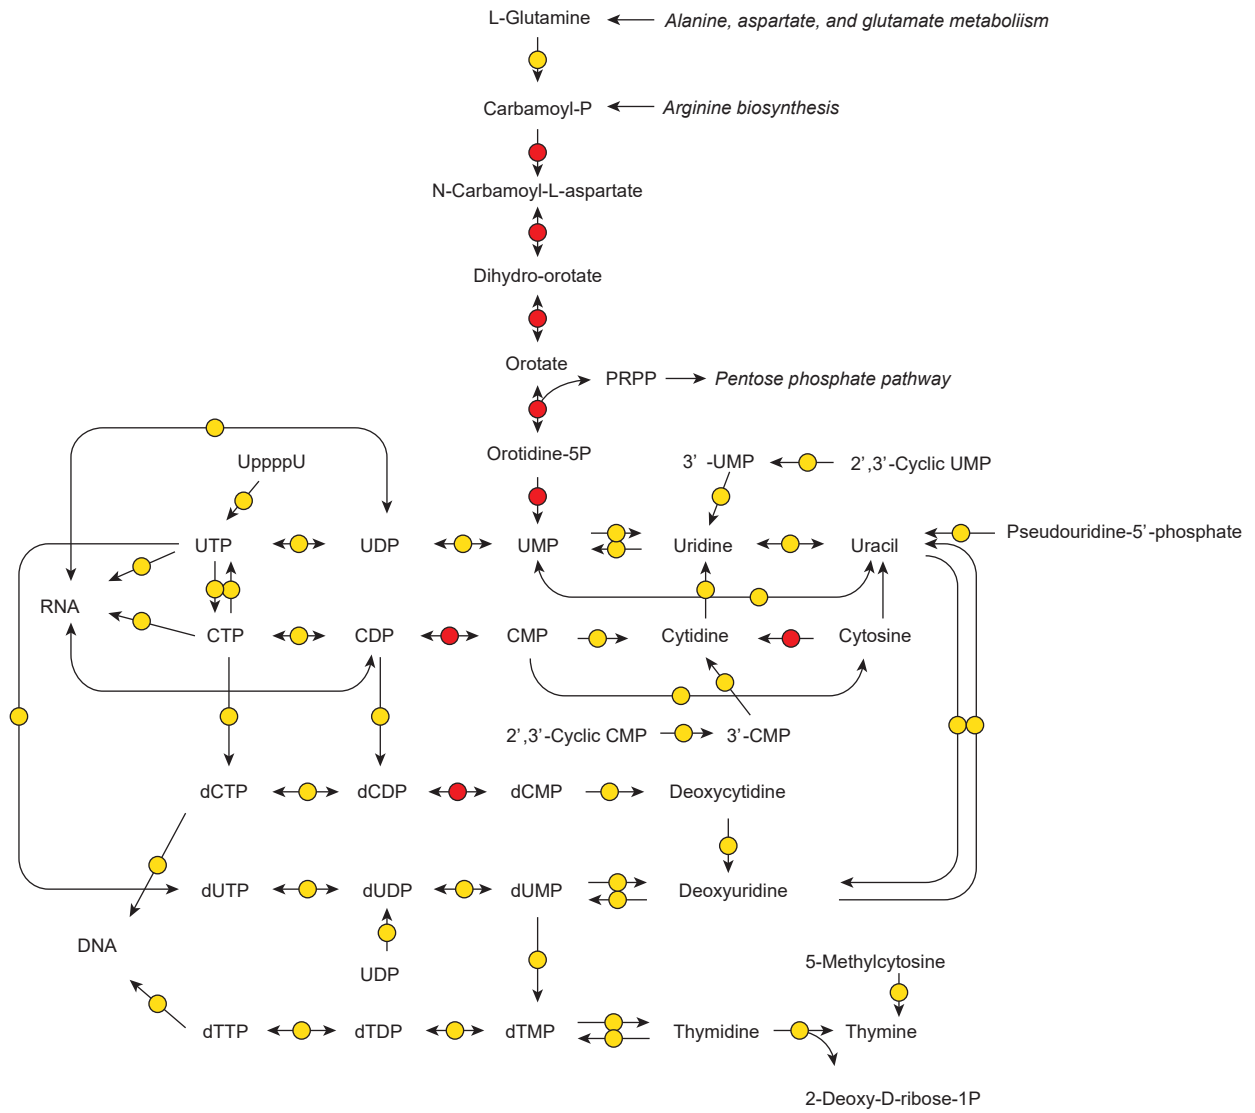

**Supplementary Figure 12 | Biosynthesis pathway of pyrimidine nucleotides in ‘*Candidatus Uab amorphum*’.** Red circles indicate genes absent in ‘*Ca. Uab amorphum*’. Yellow circles indicate genes present in ‘*Ca. Uab amorphum*’.

## Supplementary References

1. Amann, R.I. et al. Combination of 16S rRNA-targeted oligonucleotide probes with flow cytometry for analyzing mixed microbial populations. *Appl. Environ. Microbiol.* **56**, 1919–1925 (1990).
2. Neef, A., Amann, R., Schlesner, H. & Schleifer, K.H. Monitoring a widespread bacterial group: in situ detection of planctomycetes with 16S rRNA-targeted probes. *Microbiology* **144**, 3257–3266 (1998).
