# Supplementary material for: Phagocytosis-like cell engulfment by a planctomycete bacterium
Source: PubMed Central journal article supplement (PMC6906331; doi:10.1038/s41467-019-13499-2), 2019-12-11
Supplement: 41467_2019_13499_MOESM2_ESM.pdf [file 41467_2019_13499_MOESM2_ESM.pdf]

## Description of Additional Supplementary Files

File Name: Supplementary Data 1

Description: Peptidases in *Candidatus Uab amorphum* genome.

File Name: Supplementary Data 2

Description: Genes related to amino acid biosynthesis.

File Name: Supplementary Movie 1

Description: Locomotion of *Candidatus Uab amorphum*, time-lapse (20×).

File Name: Supplementary Movie 2

Description: Phagocytosis-like cell engulfment of *Candidatus Uab amorphum*, time-lapse (20×).

File Name: Supplementary Movie 3

Description: *Candidatus Uab amorphum* and *Debaryomyces hansenii* showing *Ca. Uab amorphum* does not engulf *D. hansenii*, time-lapse (40×).

File Name: Supplementary Movie 4

Description: *Candidatus Uab amorphum* and AcGFP1-labelled *Escherichia coli* showing *Ca. Uab amorphum* engulf *E. coli*, time-lapse (600×).
